# Supplementary material for: Multiple systems in macaques for tracking prediction errors and other types of surprise
Source: PLoS Biol. 2020 Oct 30;18(10):e3000899. doi: 10.1371/journal.pbio.3000899 (PMC7657565; doi:10.1371/journal.pbio.3000899)
Supplement: S2 Table — (XLSX) [file pbio.3000899.s014.xlsx]

## Sheet: Sheet1
Description	Cluster index	Local maxima	Max z-stat	F99 coordinates (mm)			Cluster size (# voxels)
				X	Y	Z
Anterolateral striatum, extending into lateral orbitofrontal cortex (area 12/47o)	1	1	3.53	-13.1	6.04	2.52	1353
		2	3.48	-13.1	5.53	0.503
		3	3.33	-16.6	9.56	5.53
		4	3.23	-10.1	3.02	4.53
		5	3.21	-21.1	11.1	2.52
		6	3.2	-11.6	4.02	4.02
